# Supplementary material
Source: Frontiers journal article supplement (https://www.frontiersin.org/articles/155266)
Supplement: downloadfile [file 155266]

# Low-Carbon Development Project in Rural India Survey

*Assessing co-benefits for food and nutritional security, respiratory health, and income*

## Section I. Survey Information

Socio-Economic Survey Number

|  |  |  |
|--|--|--|
|  |  |  |
|--|--|--|

I.i Date of Interview

|   |   |   |   |   |   |
|---|---|---|---|---|---|
| m | m | d | d | y | y |
|---|---|---|---|---|---|

I.iv Member Code

|  |  |  |  |  |
|--|--|--|--|--|
|  |  |  |  |  |
|--|--|--|--|--|

I.ii Interviewer

|  |
|--|
|  |
|--|

I.iii Household Head

|  |
|--|
|  |
|--|

I.v Notes

|  |
|--|
|  |
|--|

## Section II. Household Information

II.i Taluk

|  |
|--|
|  |
|--|

II.ii GP\_name

|  |
|--|
|  |
|--|

II.iii Village

|  |
|--|
|  |
|--|

II.vi Language

|  |
|--|
|  |
|--|

II.vii Religion

|  |
|--|
|  |
|--|

II.viii Household Size

|  |  |  |
|--|--|--|
|  |  |  |
|--|--|--|

### Household Member Information

|         | a) Name | b) Relationship to HH Head | c) Age |
|---------|---------|----------------------------|--------|
| II.xi   |         |                            |        |
| II.xii  |         |                            |        |
| II.xiii |         |                            |        |
| II.xiv  |         |                            |        |
| II.xv   |         |                            |        |
| II.xvi  |         |                            |        |

II.xvii Husband Occupation

|  |
|--|
|  |
|--|

II.xviii Do you currently use a biogas fueled cooking stove?

a If so, when was the unit established?

|       |     |      |
|-------|-----|------|
|       | Yes | No   |
| Month | Day | Year |

II.xix Do you have a Television?

Yes

No

II.xx Notes

**Section III. Dietary Diversity**

III. How many times per day, week, or month does your household eat the following foods?

| Food Source and Type                     | a) Yesterday | b) Times | c) per [ ] | d) Notes |
|------------------------------------------|--------------|----------|------------|----------|
| <b>STAPLES (Grains, Tubers, Legumes)</b> |              |          |            |          |
| III.i Rice                               |              |          |            |          |
| III.ii Ragi                              |              |          |            |          |
| III.iii Wheat                            |              |          |            |          |
| III.iv Sorghum (Jowar)                   |              |          |            |          |
| III.v Maize                              |              |          |            |          |
| III.vi Chickpeas                         |              |          |            |          |
| III.vii Lentils (Daal)                   |              |          |            |          |
| III.viii Groundnuts                      |              |          |            |          |
| III.ix Other Cereal/Pulse                |              |          |            |          |
| List:                                    |              |          |            |          |
| <b>VEGETABLES</b>                        |              |          |            |          |
| III.x Beans                              |              |          |            |          |
| III.xi Carrots                           |              |          |            |          |
| III.xii Tomatoes                         |              |          |            |          |
| III.xiii Brinja                          |              |          |            |          |
| III.xiv Onion                            |              |          |            |          |
| III.xv Spinach                           |              |          |            |          |
| III.xvi Potatoes                         |              |          |            |          |
| III.xvii Okra (Lady Finger)              |              |          |            |          |
| III.xviii Cauliflower                    |              |          |            |          |
| III.xx Chillies                          |              |          |            |          |
| <b>FRUIT</b>                             |              |          |            |          |

|                                              |                    |  |  |  |  |
|----------------------------------------------|--------------------|--|--|--|--|
| III.xxi                                      | Banana             |  |  |  |  |
| III.xxii                                     | Guava              |  |  |  |  |
| III.xxiii                                    | Grapes             |  |  |  |  |
| III.xxiv                                     | Orange             |  |  |  |  |
| III.xxv                                      | Apple              |  |  |  |  |
| III.xxvi                                     | Coconut            |  |  |  |  |
| III.xxvii                                    | Pineapple          |  |  |  |  |
| III.xxviii                                   | Chiku              |  |  |  |  |
| III.xxix                                     | Papaya             |  |  |  |  |
| <b>MEAT / FISH / EGGS</b>                    |                    |  |  |  |  |
| III.xxx                                      | Eggs (number)      |  |  |  |  |
| III.xxxi                                     | Chicken            |  |  |  |  |
| III.xxxii                                    | Fish               |  |  |  |  |
| III.xxxiii                                   | Beef (cow)         |  |  |  |  |
| III.xxxiv                                    | Pork (pig)         |  |  |  |  |
| III.xxxv                                     | Mutton (sheep)     |  |  |  |  |
| <b>DAIRY</b>                                 |                    |  |  |  |  |
| III.xxxvi                                    | Milk               |  |  |  |  |
| III.xxxvii                                   | Yogurt             |  |  |  |  |
| III.xxxviii                                  | Paneer (Cheese)    |  |  |  |  |
| III.xxxix                                    | Other Milk Product |  |  |  |  |
| List:                                        |                    |  |  |  |  |
| <b>OTHER (SUGAR, OIL, SNACKS, BEVERAGES)</b> |                    |  |  |  |  |
| III.xxxx                                     | Tea, Coffee, Chai  |  |  |  |  |
| III.xxxxi                                    | Soda (Dosa) / Cola |  |  |  |  |
| III.xxxxii                                   | Ice cream          |  |  |  |  |
| III.xxxxiii                                  | Biscuits           |  |  |  |  |

III.xxxxiv Note: List below any additional foods or unusual circumstances (no salt, sugar, or spices)

|  |
|--|
|  |
|  |

III.xxxxv How many meals did your household consume yesterday?

|  |
|--|
|  |
|--|

III.xxxxvi Does your family cook new (types of) foods with the bio-gas cookstove?

|     |    |
|-----|----|
| Yes | No |
|-----|----|

a If yes, what kinds of foods?

III.xxxxvii In these months, was there a day in which your household did not have enough food?

| Jan | Feb | Mar | April | May | Jun | July | Aug | Sept | Oct | Nov | Dec |
|-----|-----|-----|-------|-----|-----|------|-----|------|-----|-----|-----|
|     |     |     |       |     |     |      |     |      |     |     |     |

*Note: Record MIHFS*

III.xxxxviii Notes

## Section IV. Female Allocations of Time

RESPONDANT

How many hours did [respondant] spend engaging in the following activities?

Did they receive any payment (monetary, gift, otherwise) for this activity?

|        | Activity           | a) Time | b) Hr/day | c) Compensation? | d) Notes |
|--------|--------------------|---------|-----------|------------------|----------|
| IV.i   | Cooking            |         |           |                  |          |
| IV.ii  | Housework (clean)  |         |           |                  |          |
| IV.iii | Labor work         |         |           |                  |          |
|        | List:              |         |           |                  |          |
| IV.iv  | Relaxing (TV etc.) |         |           |                  |          |
| IV.v   | Socializing        |         |           |                  |          |
| IV.vi  | Other              |         |           |                  |          |
|        | List:              |         |           |                  |          |

WOMAN # 2

How many hours did [Woman #2] spend engaging in the following activities?

Did they receive any payment (monetary, gift, otherwise) for this activity?

|         | Activity          | a) Time | b) Hr/day | c) Compensation? | d) Notes |
|---------|-------------------|---------|-----------|------------------|----------|
| IV.vii  | Cooking           |         |           |                  |          |
| IV.viii | Housework (clean) |         |           |                  |          |
| IV.ix   | Labor work        |         |           |                  |          |

|        |                    |  |  |  |
|--------|--------------------|--|--|--|
| List:  |                    |  |  |  |
| IV.x   | Relaxing (TV etc.) |  |  |  |
| IV.xi  | Socializing        |  |  |  |
| IV.xii | Other              |  |  |  |
| List:  |                    |  |  |  |

**WOMAN # 3**

How many hours did [Woman #3] spend engaging in the following activities?

Did they receive any payment (monetary, gift, otherwise) for this activity?

|          | Activity           | a) Time | b) Hr/day | c) Compensation? | d) Notes |
|----------|--------------------|---------|-----------|------------------|----------|
| IV.xiii  | Cooking            |         |           |                  |          |
| IV.xiv   | Housework (clean)  |         |           |                  |          |
| IV.xv    | Labor work         |         |           |                  |          |
| List:    |                    |         |           |                  |          |
| IV.xvi   | Relaxing (TV etc.) |         |           |                  |          |
| IV.xvii  | Socializing        |         |           |                  |          |
| IV.xviii | Other              |         |           |                  |          |
| List:    |                    |         |           |                  |          |

IV.xix Notes

---

**Section V. Children Allocations of Time**

V.i Name of Child #1:

V.ii What is the highest level of schooling [CHILD 1] attended?

How many hours did [Child #1] spend engaging in the following activities?

Did they receive any payment (monetary, gift, otherwise) for this activity?

|       | Activity | a) Time | b) Hr/day | c) Compensation? | d) Notes |
|-------|----------|---------|-----------|------------------|----------|
| V.iii | School   |         |           |                  |          |

|        |                    |  |  |  |  |
|--------|--------------------|--|--|--|--|
| V.iv   | Homework           |  |  |  |  |
| V.v    | Helping with house |  |  |  |  |
| V.vi   | Labor Work         |  |  |  |  |
| List:  |                    |  |  |  |  |
| V.vii  | Playing            |  |  |  |  |
| V.viii | Other              |  |  |  |  |
| List:  |                    |  |  |  |  |

V.ix Name of Child #2:

V.x What is the highest level of schooling [CHILD 2] attended?

How many hours did [Child #2] spend engaging in the following activities?

Did they receive any payment (monetary, gift, otherwise) for this activity?

|        | Activity           | a) Time | b) Hr/day | c) Compensation? | d) Notes |
|--------|--------------------|---------|-----------|------------------|----------|
| V.xi   | School             |         |           |                  |          |
| V.xii  | Homework           |         |           |                  |          |
| V.xiii | Helping with house |         |           |                  |          |
| V.xiv  | Labor Work         |         |           |                  |          |
| List:  |                    |         |           |                  |          |
| V.xv   | Playing            |         |           |                  |          |
| V.xvi  | Other              |         |           |                  |          |
| List:  |                    |         |           |                  |          |

V.xvii Name of Child #3:

V.xiii What is the highest level of schooling [CHILD 3] attended?

How many hours did [Child #3] spend engaging in the following activities?

Did they receive any payment (monetary, gift, otherwise) for this activity?

|       | Activity | a) Time | b) Hr/day | c) Compensation? | d) Notes |
|-------|----------|---------|-----------|------------------|----------|
| V.xiv | School   |         |           |                  |          |
| V.xv  | Homework |         |           |                  |          |

|         |                    |  |  |  |  |
|---------|--------------------|--|--|--|--|
| V.xvi   | Helping with house |  |  |  |  |
| V.xvii  | Labor Work         |  |  |  |  |
|         | List:              |  |  |  |  |
| V.xviii | Playing            |  |  |  |  |
| V.xix   | Other              |  |  |  |  |
|         | List:              |  |  |  |  |

V.xx Name of Child #4:

V.xxi What is the highest level of schooling [CHILD 4] attended?

How many hours did [Child #4] spend engaging in the following activities?

Did they receive any payment (monetary, gift, otherwise) for this activity?

|         | Activity           | a) Time | b) Hr/day | c) Compensation? | d) Notes |
|---------|--------------------|---------|-----------|------------------|----------|
| V.xxii  | School             |         |           |                  |          |
| V.xxiii | Homework           |         |           |                  |          |
| V.xxiv  | Helping with house |         |           |                  |          |
| V.xxv   | Labor Work         |         |           |                  |          |
|         | List:              |         |           |                  |          |
| V.xxvi  | Playing            |         |           |                  |          |
| V.xxvii | Other              |         |           |                  |          |
|         | List:              |         |           |                  |          |

V.xxviii Notes



---



---

## Section VI. Respiratory Health

[Respondant] Respiratory Health

VI.ii Suffered last month? (Dec 2012)

VI.iii Does it keep her from working?

| a) Headache | b) Asthma/Cough | c) Lung Disease | d) TB |
|-------------|-----------------|-----------------|-------|
|             |                 |                 |       |
|             |                 |                 |       |

- VI.iv Does it require a doctors visit?
- VI.v Does she take medication for this?
- VI.vi Estimated Cost of the Problem?
- VI.vii Unit of cost (per visit, week, month)

|  |  |  |  |
|--|--|--|--|
|  |  |  |  |
|  |  |  |  |
|  |  |  |  |
|  |  |  |  |

[OTHER WOMEN (plural)] Respiratory Health

- VI.ix Suffered last month? (Dec 2012)
- VI.x Does it keep her from working?
- VI.xi Does it require a doctors visit?
- VI.xii Does she take medication for this?
- VI.xiii Estimated Cost of the Problem?
- VI.xiv Unit of cost (per visit, week, month)

| a) Headache | b Asthma/Cough | c) Lung Disease | d) TB |
|-------------|----------------|-----------------|-------|
|             |                |                 |       |
|             |                |                 |       |
|             |                |                 |       |
|             |                |                 |       |
|             |                |                 |       |
|             |                |                 |       |

[ALL CHILDREN] Respiratory Health

- VI.xv Suffered last month? (Dec 2012)
- VI.xvi Does it keep her from working?
- VI.xvii Does it require a doctors visit?
- VI.xviii Does she take medication for this?
- VI.xix Estimated Cost of the Problem?
- VI.xx Unit of cost (per visit, week, month)

| a) Headache | b Asthma/Cough | c) Lung Disease | d) TB |
|-------------|----------------|-----------------|-------|
|             |                |                 |       |
|             |                |                 |       |
|             |                |                 |       |
|             |                |                 |       |
|             |                |                 |       |
|             |                |                 |       |

V.xxii Notes  
(e.g. of diff health status  
for specific children,  
women)

|  |
|--|
|  |
|--|



## Low Carbon Development Project in Rural India Survey

### Section VII. ASSET INFORMATION

Survey Number

|  |  |  |
|--|--|--|
|  |  |  |
|--|--|--|

Village:

Household Head:

Taluk:

Date:

|  |  |  |
|--|--|--|
|  |  |  |
|  |  |  |

VII.i Do you own or have the following features in your home?

|                |                       |                                  |                      |                                     |
|----------------|-----------------------|----------------------------------|----------------------|-------------------------------------|
| Clock or Watch | Bicycle               | Drinking Water From Pump/Well    | Flush Toilet         | Number of Rooms in Dwelling         |
| Radio          | Motorcycle or Scooter | Drinking Water From Open Source  | Pit Toilet/Latrine   | Kitchen a Separate Room             |
| Television     | Car                   | Drinking Water From Other Source | None/Other Toilet    | Dwelling all Low-Quality Materials  |
| Sewing Machine | Refrigerator          | Main Source of Light Electric    | Own > 3.6 Acres Land | Dwelling all High-Quality Materials |

### Section VII. ASSET INFORMATION

Survey Number

|  |  |  |
|--|--|--|
|  |  |  |
|--|--|--|

Village:

Household Head:

Taluk:

Date:

|  |  |  |
|--|--|--|
|  |  |  |
|  |  |  |

VII.i Do you own or have the following features in your home?

|                |                       |                                  |                      |                                     |
|----------------|-----------------------|----------------------------------|----------------------|-------------------------------------|
| Clock or Watch | Bicycle               | Drinking Water From Pump/Well    | Flush Toilet         | Number of Rooms in Dwelling         |
| Radio          | Motorcycle or Scooter | Drinking Water From Open Source  | Pit Toilet/Latrine   | Kitchen a Separate Room             |
| Television     | Car                   | Drinking Water From Other Source | None/Other Toilet    | Dwelling all Low-Quality Materials  |
| Sewing Machine | Refrigerator          | Main Source of Light Electric    | Own > 3.6 Acres Land | Dwelling all High-Quality Materials |

### Section VII. ASSET INFORMATION

Survey Number

|  |  |  |
|--|--|--|
|  |  |  |
|--|--|--|

Village:

Household Head:

Taluk:

Date:

|  |  |  |
|--|--|--|
|  |  |  |
|  |  |  |

VII.i Do you own or have the following features in your home?

|                |                       |                                  |                      |                                     |
|----------------|-----------------------|----------------------------------|----------------------|-------------------------------------|
| Clock or Watch | Bicycle               | Drinking Water From Pump/Well    | Flush Toilet         | Number of Rooms in Dwelling         |
| Radio          | Motorcycle or Scooter | Drinking Water From Open Source  | Pit Toilet/Latrine   | Kitchen a Separate Room             |
| Television     | Car                   | Drinking Water From Other Source | None/Other Toilet    | Dwelling all Low-Quality Materials  |
| Sewing Machine | Refrigerator          | Main Source of Light Electric    | Own > 3.6 Acres Land | Dwelling all High-Quality Materials |
